# Supplementary material for: Field-Crop Soils in Eastern France: Coldspots of Azole-Resistant Aspergillus fumigatus
Source: MDPI journal article supplement (doi:10.3390/jof9060618), 2023-05-27
Supplement: s1 [file s1]

# SUPPLEMENTAL DATA

|                 | Precursor ion | Production ion | Collision energy (eV) | Retention time (min) |
|-----------------|---------------|----------------|-----------------------|----------------------|
| Propiconazole   | 173           | 146            | 18                    | 26.361; 27.066       |
|                 | 173           | 109            | 30                    |                      |
| Tebuconazole    | 125           | 99             | 20                    | 27.353               |
|                 | 125           | 89             | 20                    |                      |
| Epoxyconazole   | 192           | 138            | 12                    | 26.648; 27.918       |
|                 | 192           | 111            | 32                    |                      |
| Bromuconazole   | 173           | 145            | 26                    | 28.312; 29.016       |
|                 | 173           | 109            | 30                    |                      |
| Difenconazole   | 265           | 202            | 36                    | 34.366; 34.485       |
|                 | 265           | 139            | 40                    |                      |
| Tebuconazole d6 | 256           | 125            | 26                    | 27.287               |
|                 | 256           | 73             | 10                    |                      |

Table S1: Mass spectrometry parameters of the triazoles studied

|          | Isolates | Plot ID | Culture media of strain detection | MIC voriconazole (mg/L) | MIC itraconazole (mg.L) |
|----------|----------|---------|-----------------------------------|-------------------------|-------------------------|
| BURGUNDY | 1        | POP     | Malt + itraconazole               | 1                       | 0.25                    |
|          | 2        | POP     | DG18                              | 0.5                     | 0.5                     |
|          | 3        | POP     | DG18                              | 0.25                    | 0.25                    |
|          | 4        | POP     | DG18                              | 0.5                     | 0.5                     |
|          | 5        | POP     | DG18                              | 0.5                     | 0.25                    |
|          | 6        | MJP     | DG18                              | 1                       | 0.5                     |
|          | 7        | MJP     | DG18                              | 1                       | 0.5                     |
|          | 8        | MJP     | DG18                              | 0.5                     | 0.5                     |
|          | 9        | MJP     | DG18                              | 0.5                     | 0.5                     |
|          | 10       | CHP     | DG18                              | 0.5                     | 0.25                    |
|          | 11       | MOP     | Malt + voriconazole               | 1                       | 0.5                     |
|          | 12       | MOP     | Malt + voriconazole               | 1                       | 0.5                     |
|          | 13       | MOP     | Malt + voriconazole               | 1                       | 1                       |
|          | 14       | MOP     | Malt + voriconazole               | 1                       | 0.5                     |
|          | 15       | MOP     | Malt + voriconazole               | 1                       | 0.5                     |
|          | 16       | MOP     | Malt + voriconazole               | 1                       | 0.5                     |
|          | 17       | MOP     | Malt + voriconazole               | 0.5                     | 1                       |
|          | 18       | MOP     | Malt + voriconazole               | 1                       | 0.5                     |
|          | 19       | MOP     | Malt + voriconazole               | 1                       | 0.5                     |
|          | 20       | MOP     | Malt + voriconazole               | 1                       | 0.5                     |
|          | 21       | MOP     | Malt + voriconazole               | 1                       | 1                       |
|          | 22       | MOP     | Malt + voriconazole               | 0.5                     | 1                       |
|          | 23       | MOP     | Malt + voriconazole               | 1                       | 0.5                     |
|          | 24       | MOP     | Malt + voriconazole               | 1                       | 0.5                     |
|          | 25       | MOP     | Malt + itraconazole               | 1                       | 0.5                     |
|          | 26       | MOP     | Malt + itraconazole               | 1                       | 0.5                     |
|          | 27       | MOP     | Malt + itraconazole               | 1                       | 0.5                     |
|          | 28       | MOP     | Malt + itraconazole               | 1                       | 0.5                     |
|          | 29       | MOP     | Malt + itraconazole               | 1                       | 0.5                     |
|          | 30       | MOP     | Malt + itraconazole               | 1                       | 0.5                     |
|          | 31       | MOP     | Malt + itraconazole               | 1                       | 0.5                     |
|          | 32       | MOP     | DG18                              | 0.5                     | 0.5                     |
|          | 33       | MOP     | DG18                              | 0.5                     | 0.25                    |
|          | 34       | MOP     | DG18                              | 0.5                     | 0.5                     |
|          | 35       | MOP     | DG18                              | 1                       | 0.5                     |
|          | 36       | MOP     | DG18                              | 1                       | 0.5                     |
|          | 37       | QUP     | DG18                              | 0.5                     | 0.25                    |

|  |    |     |                     |     |      |
|--|----|-----|---------------------|-----|------|
|  | 38 | QUP | DG18                | 0.5 | 0.5  |
|  | 39 | QUP | DG18                | 0.5 | 0.5  |
|  | 40 | QUP | DG18                | 0.5 | 1    |
|  | 41 | QUP | DG18                | 0.5 | 1    |
|  | 42 | QUP | DG18                | 1   | 0.5  |
|  | 43 | MAP | DG18                | 0.5 | 0.25 |
|  | 44 | MAP | DG18                | 0.5 | 0.5  |
|  | 45 | MAP | DG18                | 0.5 | 0.5  |
|  | 46 | BGP | Malt + itraconazole | 1   | 0.5  |
|  | 47 | BGP | Malt + itraconazole | 1   | 0.5  |
|  | 48 | BGP | Malt + itraconazole | 1   | 0.5  |
|  | 49 | SFP | Malt + voriconazole | 1   | 0.5  |
|  | 50 | SFP | Malt + voriconazole | 0.5 | 0.5  |
|  | 51 | SFP | Malt + voriconazole | 1   | 0.5  |
|  | 52 | SFP | Malt + voriconazole | 1   | 0.5  |
|  | 53 | SFP | Malt + voriconazole | 1   | 0.5  |
|  | 54 | SFP | Malt + voriconazole | 1   | 0.5  |
|  | 55 | SFP | Malt + voriconazole | 1   | 1    |
|  | 56 | SFP | Malt + voriconazole | 1   | 0.5  |
|  | 57 | SFP | Malt + voriconazole | 1   | 1    |
|  | 58 | SFP | Malt + itraconazole | 1   | 0.5  |
|  | 59 | SFP | Malt + itraconazole | 1   | 0.5  |
|  | 60 | SFP | Malt + itraconazole | 1   | 0.5  |
|  | 61 | SFP | Malt + itraconazole | 1   | 0.5  |
|  | 62 | SFP | Malt + itraconazole | 1   | 1    |
|  | 63 | SFP | DG18                | 1   | 1    |
|  | 64 | SFP | DG18                | 0.5 | 0.5  |
|  | 65 | SFP | DG18                | 0.5 | 0.5  |
|  | 66 | SFP | DG18                | 1   | 0.5  |
|  | 67 | SFP | DG18                | 0.5 | 0.5  |
|  | 68 | SFP | DG18                | 0.5 | 0.25 |
|  | 69 | SFP | DG18                | 0.5 | 0.5  |
|  | 70 | SFP | DG18                | 1   | 0.5  |
|  | 71 | SFP | DG18                | 0.5 | 0.5  |
|  | 72 | SFP | DG18                | 1   | 0.5  |
|  | 73 | SFP | DG18                | 0.5 | 0.5  |
|  | 74 | SFP | DG18                | 0.5 | 0.25 |
|  | 75 | SFP | DG18                | 0.5 | 0.25 |
|  | 76 | SFP | DG18                | 1   | 0.5  |

|          |     |     |                     |      |      |
|----------|-----|-----|---------------------|------|------|
| LORRAINE | 77  | SFP | DG18                | 0.5  | 0.5  |
|          | 78  | SFP | DG18                | 0.5  | 0.5  |
|          | 79  | SFP | DG18                | 1    | 0.5  |
|          | 80  | SFP | DG18                | 0.5  | 0.5  |
|          | 81  | SFP | DG18                | 0.5  | 0.5  |
|          | 82  | SFP | DG18                | 1    | 0.5  |
|          | 83  | SFP | DG18                | 0.5  | 0.25 |
|          | 84  | SFP | DG18                | 0.5  | 1    |
|          | 85  | LHP | DG18                | 0.5  | 0.25 |
|          | 86  | LHP | DG18                | 0.5  | 1    |
|          | 87  | LHP | DG18                | 0.5  | 0.5  |
|          | 88  | LHP | DG18                | 0.5  | 0.5  |
|          | 89  | LHP | DG18                | 0.5  | 0.5  |
|          | 90  | LHP | DG18                | 0.5  | 0.25 |
|          | 91  | LHP | DG18                | 0.5  | 0.5  |
|          | 92  | LHP | DG18                | 0.5  | 0.5  |
|          | 93  | LHP | DG18                | 1    | 0.5  |
|          | 94  | LHP | DG18                | 1    | 0.5  |
|          | 95  | LHP | DG18                | 0.5  | 0.5  |
|          | 96  | LHP | DG18                | 1    | 0.5  |
|          | 97  | LHP | DG18                | 0.5  | 0.5  |
|          | 98  | LHP | DG18                | 0.5  | 0.5  |
|          | 99  | LHP | DG18                | 1    | 0.25 |
|          | 100 | LHP | DG18                | 0.5  | 0.5  |
|          | 101 | LHP | DG18                | 1    | 0.5  |
| LORRAINE | 102 | BP  | Malt + itraconazole | 0.5  | 0.25 |
|          | 103 | PCP | Malt + itraconazole | 1    | 1    |
|          | 104 | RP  | Malt + itraconazole | 1    | 0.5  |
|          | 105 | DJP | Malt + itraconazole | 0.5  | 1    |
|          | 106 | DJP | Malt + itraconazole | 0.5  | 1    |
|          | 107 | DJP | Malt + itraconazole | 0.5  | 0.5  |
|          | 108 | DJP | Malt + itraconazole | 1    | 1    |
|          | 109 | DJP | Malt + itraconazole | 1    | 0.5  |
|          | 110 | DJP | DG18                | 0.25 | 0.25 |
|          | 111 | DJP | DG18                | 1    | 0.25 |
|          | 112 | DJP | DG18                | 0.25 | 0.5  |
|          | 113 | DJP | DG18                | 0.5  | 1    |
|          | 114 | DJP | DG18                | 0.5  | 0.5  |
|          | 115 | DJP | DG18                | 0.5  | 1    |

|  |     |     |                     |      |       |
|--|-----|-----|---------------------|------|-------|
|  | 116 | DJP | DG18                | 0.5  | 0.5   |
|  | 117 | DJP | DG18                | 1    | 0.5   |
|  | 118 | DJP | DG18                | 0.5  | 1     |
|  | 119 | DJP | DG18                | 0.5  | 0.5   |
|  | 120 | DJP | DG18                | 1    | 1     |
|  | 121 | DJP | DG18                | 0.5  | 1     |
|  | 122 | DJP | DG18                | 0.5  | 1     |
|  | 123 | DJP | DG18                | 0.25 | 0.25  |
|  | 124 | DJP | DG18                | 0.5  | 0.5   |
|  | 125 | DJP | DG18                | 1    | 0.25  |
|  | 126 | DJP | DG18                | 1    | 0.5   |
|  | 127 | DJP | DG18                | 0.5  | 0.5   |
|  | 128 | DJP | DG18                | 0.25 | 0.5   |
|  | 129 | DJP | DG18                | 0.5  | 0.5   |
|  | 130 | DJP | DG18                | 0.5  | 0.5   |
|  | 131 | DJP | DG18                | 0.5  | 0.125 |
|  | 132 | DJP | DG18                | 0.25 | 0.25  |
|  | 133 | VSP | Malt + itraconazole | 0.5  | 0.25  |
|  | 134 | VSP | Malt + itraconazole | 0.5  | 0.5   |
|  | 135 | VSP | Malt + itraconazole | 0.5  | 1     |
|  | 136 | VSP | Malt + itraconazole | 1    | 0.5   |
|  | 137 | VSP | Malt + itraconazole | 0.5  | 0.25  |
|  | 138 | VSP | DG18                | 0.5  | 0.125 |
|  | 139 | VSP | DG18                | 0.5  | 0.125 |
|  | 140 | VSP | DG18                | 0.25 | 0.5   |
|  | 141 | VSP | DG18                | 1    | 0.5   |
|  | 142 | VSP | DG18                | 1    | 0.5   |
|  | 143 | VSP | DG18                | 1    | 0.25  |
|  | 144 | VSP | DG18                | 0.5  | 0.25  |
|  | 145 | VSP | DG18                | 0.5  | 1     |
|  | 146 | VSP | DG18                | 0.25 | 0.5   |
|  | 147 | VSP | DG18                | 1    | 1     |
|  | 148 | VSP | DG18                | 1    | 0.5   |
|  | 149 | VSP | DG18                | 0.5  | 0.25  |
|  | 150 | VSP | DG18                | 0.5  | 0.5   |
|  | 151 | VSP | DG18                | 0.5  | 0.5   |
|  | 152 | VSP | DG18                | 0.5  | 0.25  |
|  | 153 | VSP | DG18                | 1    | 0.5   |
|  | 154 | VSP | DG18                | 1    | 0.5   |
|  | 155 | TP  | Malt + itraconazole | 1    | 0.5   |

|     |     |                     |     |      |
|-----|-----|---------------------|-----|------|
| 156 | TP  | Malt + itraconazole | 0.5 | 0.5  |
| 157 | TP  | Malt + itraconazole | 1   | 0.5  |
| 158 | TP  | Malt + itraconazole | 1   | 0.5  |
| 159 | TP  | Malt + itraconazole | 1   | 0.5  |
| 160 | TP  | DG18                | 0.5 | 0.25 |
| 161 | TP  | DG18                | 0.5 | 0.5  |
| 162 | TP  | DG18                | 0.5 | 0.5  |
| 163 | TP  | DG18                | 1   | 0.5  |
| 164 | GCP | Malt + itraconazole | 1   | 1    |
| 165 | LIP | Malt + itraconazole | 1   | 1    |
| 166 | LIP | Malt + itraconazole | 1   | 0.5  |

**Table S2:** Characteristics of isolates: media of detection and minimal inhibition concentrations to itraconazole and voriconazole.

| Target Name         | Quantity<br>(fg/ $\mu$ L) | Cq Mean | Cq SD | Amplification<br>efficiencies | R <sup>2</sup> |
|---------------------|---------------------------|---------|-------|-------------------------------|----------------|
| <i>A. fumigatus</i> | 5000                      | 25.9    | 0.2   | 90.2%                         | 0.989          |
| <i>A. fumigatus</i> | 500                       | 29.6    | 0.2   |                               |                |
| <i>A. fumigatus</i> | 50                        | 33.0    | 0.1   |                               |                |
| <i>A. fumigatus</i> | 5                         | 36.8    | 0.6   |                               |                |
| <i>A. fumigatus</i> | 0.5                       | 40.2    | 1.2   |                               |                |
| Panfungal           | 5000                      | 26.6    | 0.3   | 91.7%                         | 0.988          |
| Panfungal           | 500                       | 30.4    | 0.3   |                               |                |
| Panfungal           | 50                        | 34.0    | 0.4   |                               |                |
| Panfungal           | 5                         | 37.6    | 0.4   |                               |                |
| Panfungal           | 0.5                       | 40.6    | 1.1   |                               |                |

**Table S3:** Cq obtained, amplification efficiencies and the R<sup>2</sup> for qPCR assays (standard curves)

| Explanatory variables  | Test                 | Response variables                      |                                        |                                |
|------------------------|----------------------|-----------------------------------------|----------------------------------------|--------------------------------|
|                        |                      | <i>A. fumigatus</i> isolated by culture | <i>A. fumigatus</i> quantified by qPCR | Fungal load quantified by qPCR |
| Region                 | Wilcoxon             | 0.26                                    | 0.24                                   | 0.15                           |
| Fungicide treatment    | Kruskal Wallis       | 0.58                                    | 0.26                                   | 0.61                           |
| Type of culture        | Kruskal Wallis       | 0.58                                    | 0.59                                   | 0.26                           |
| Organic matter content | Spearman correlation | 0.38                                    | 0.19                                   | 0.90                           |
| pH                     | Spearman correlation | 0.53                                    | 0.31                                   | 0.39                           |
| Proportion of silt     | Spearman correlation | 0.99                                    | 0.41                                   | 0.75                           |
| Proportion of clay     | Spearman correlation | 0.66                                    | 0.88                                   | 0.22                           |
| Proportion of sand     | Spearman correlation | 0.82                                    | 0.79                                   | 0.51                           |

Table S4: Outputs of statistical analysis (p-values).
